# Supplementary material
Source: publisher figshare collection journal article supplement (https://acs.figshare.com/ndownloader/files/15596372)
Supplement: Supplementary file 1 [file 15596372]

## Supporting Information

### **Modeling of multi-process behavior for feedstock-mixed porous pellet: heat and mass transfer, chemical reaction and phase change**

Qian Xu<sup>a</sup>, Yinshi Li<sup>a\*</sup>, Shipei Deng<sup>a</sup>, Ya-Ling He<sup>a</sup>, Lu Li<sup>a</sup>, Huajie Yu<sup>a</sup>

<sup>a</sup>Key Laboratory of Thermo-Fluid Science and Engineering of MOE, School of Energy and Power Engineering, Xi'an Jiaotong University, 28 Xianning West Road, Xi'an, Shaanxi 710049, China

Number of Pages: 3

Number of Figures: 2

---

\*Corresponding author

E-mail: ysli@mail.xjtu.edu.cn

(a)

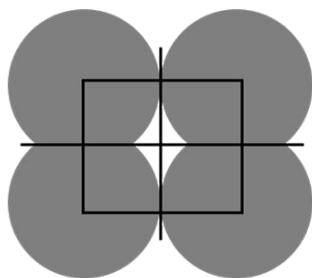

(b)

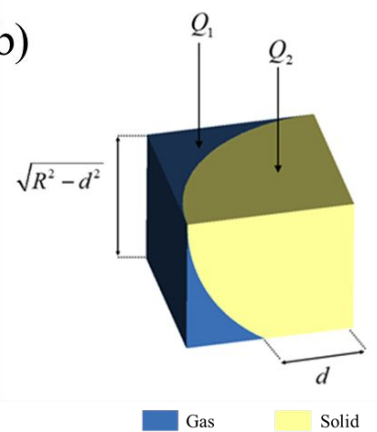

**Fig. S1.** Particle stacking geometric model, (a) microstructure (b) unit.

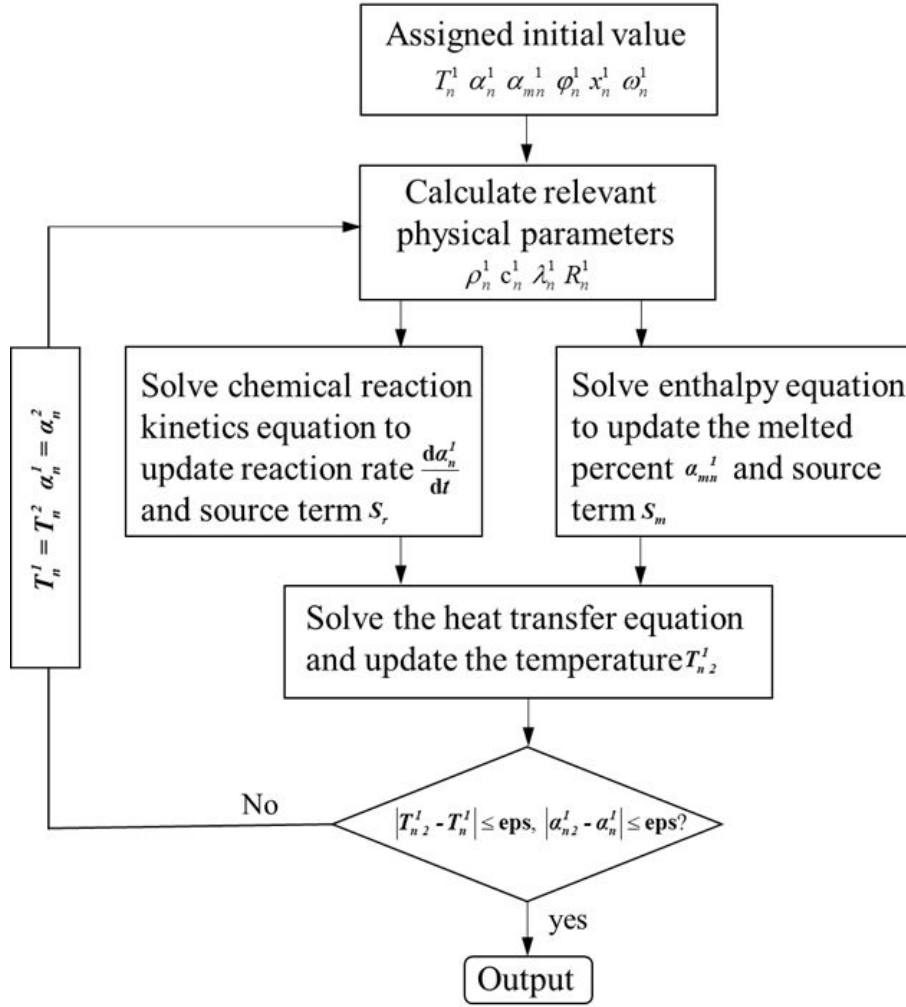

**Fig. S2.** Flowchart of code
